# Supplementary material for: Facile synthesis and properties of dithieno[3,2-b:2′,3′-d]arsoles
Source: Royal Society of Chemistry journal article supplement (doi:10.1039/c6dt02034h), 2016-01-01
Supplement: c6dt02034h1.pdf [file c6dt02034h1.pdf]

## Electronic Supplementary Information

### Facile Synthesis and Properties of Dithieno[3,2-*b*:2',3'-*d*]arsoles

Takuji Kato, Hiroaki Imoto, Susumu Tanaka, Makoto Ishidoshiro, Kensuke Naka\*

#### Contents:

1. NMR spectra
2. Crystallographic data
3. Optical properties
4. CV data
5. Theoretical calculations

## 1. NMR spectra

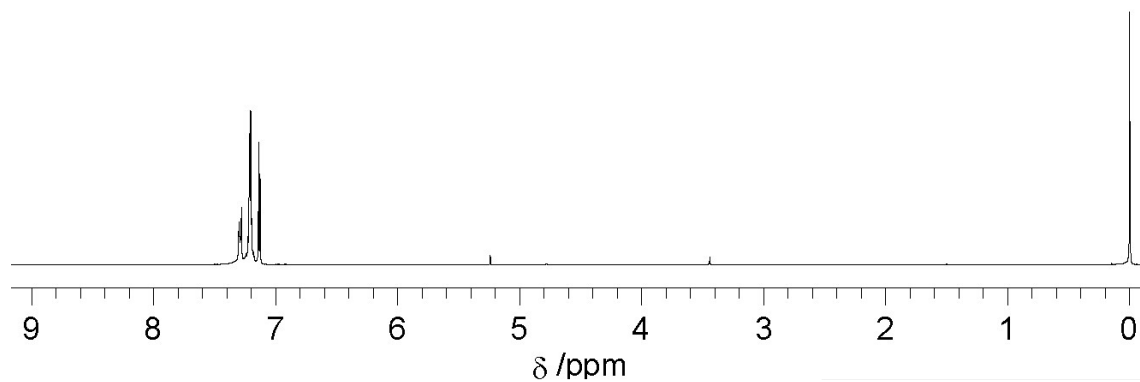

**Fig. S1**  $^1\text{H}$  NMR spectrum (400 MHz) of **3** in  $\text{CDCl}_3$ .

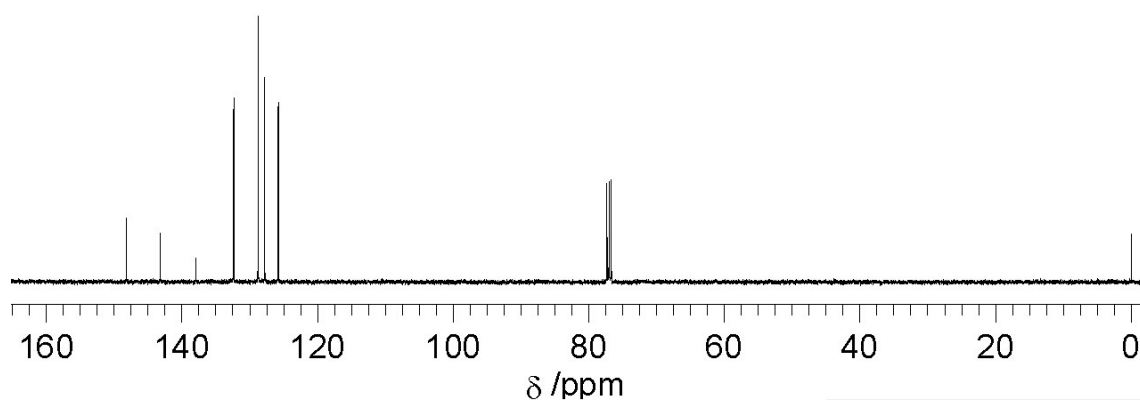

**Fig. S2**  $^{13}\text{C}$  NMR spectrum (100 MHz) of **3** in  $\text{CDCl}_3$ .

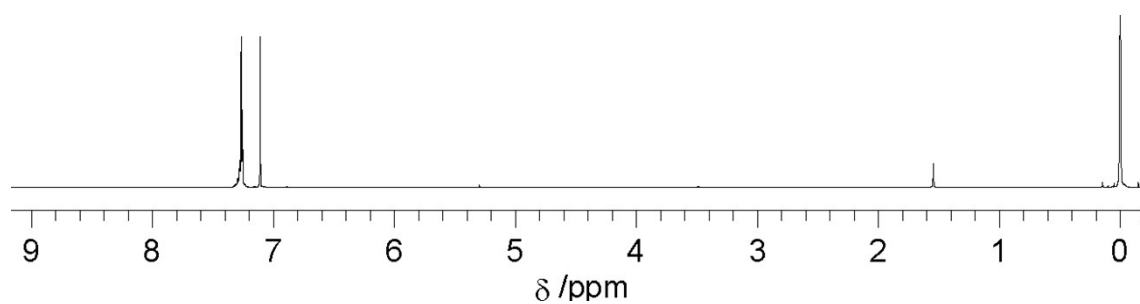

**Fig. S3**  $^1\text{H}$  NMR spectrum (400 MHz) of **4** in  $\text{CDCl}_3$ .

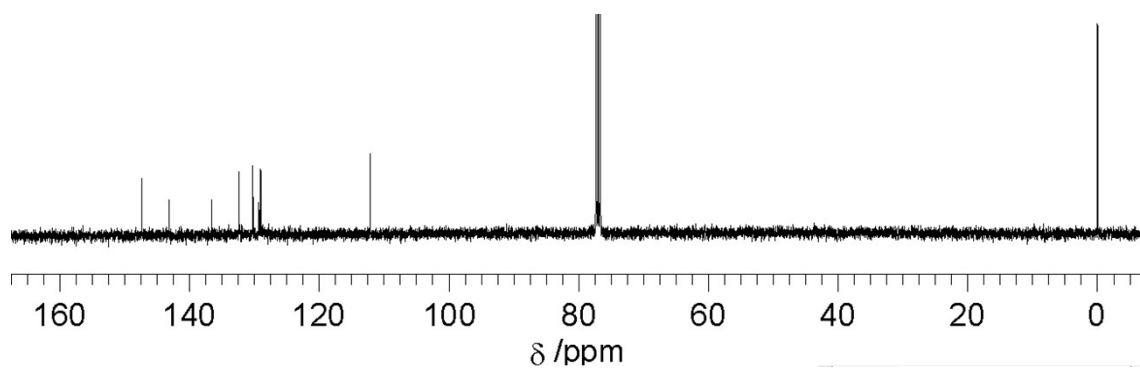

**Fig. S4**  $^{13}\text{C}$  NMR spectrum (100 MHz) of **4** in  $\text{CDCl}_3$ .

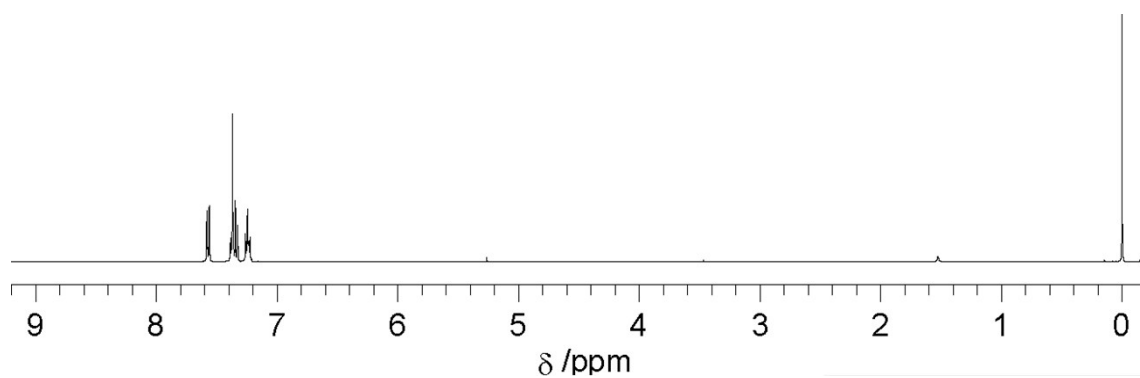

**Fig. S5**  $^1\text{H}$  NMR spectrum (400 MHz) of **5** in  $\text{CDCl}_3$ .

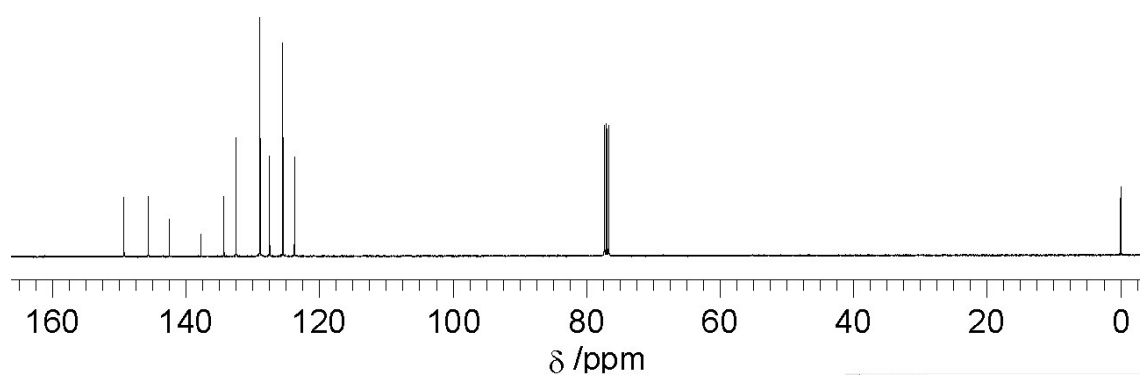

**Fig. S6**  $^{13}\text{C}$  NMR spectrum (100 MHz) of **5** in  $\text{CDCl}_3$ .

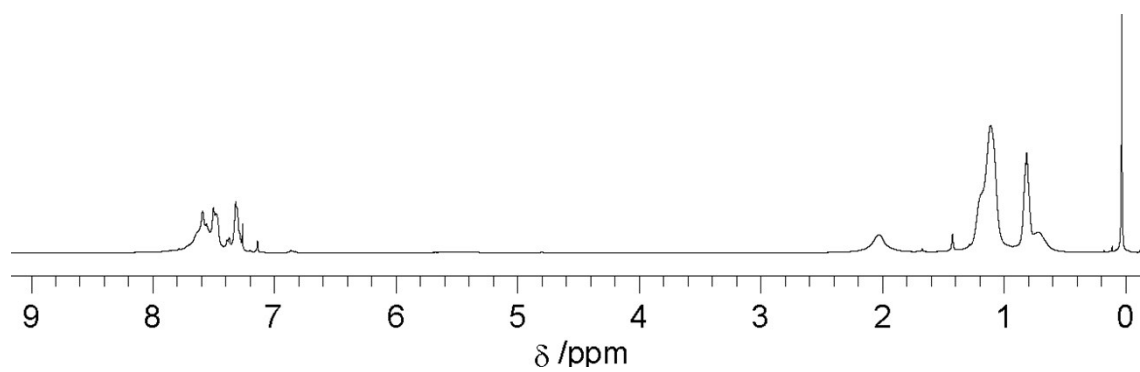

**Fig. S7** <sup>1</sup>H NMR spectrum (400 MHz) of **6** in CDCl<sub>3</sub>.

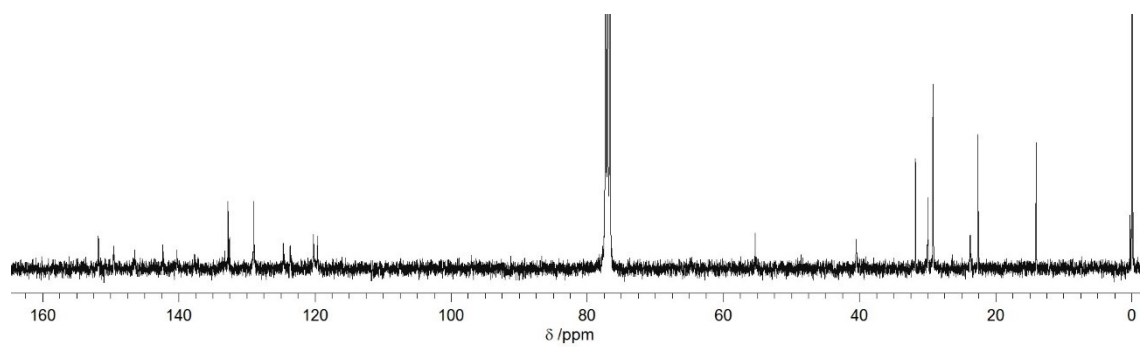

**Fig. S8** <sup>13</sup>C NMR spectrum (100 MHz) of **6** in CDCl<sub>3</sub>.

## 2. Crystallographic data

**Table S1.** ORTEP drawing (ellipsoids at 50% probability), selected angles (deg) and distances (Å) of 3.

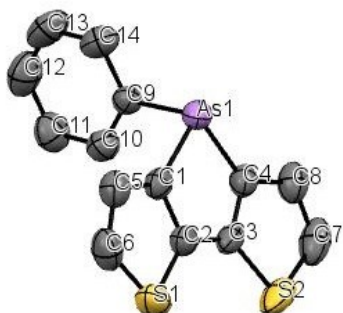

| interplanar angle (°)                          |          | angle (°)       |          |
|------------------------------------------------|----------|-----------------|----------|
| As(1)C(1)C(2)C(3)C(4)-<br>S(1)C(2)C(1)C(5)C(6) | 1.94     | C(1)-As(1)-C(4) | 85.4(2)  |
| As(1)C(1)C(2)C(3)C(4)-<br>S(2)C(3)C(4)C(8)C(7) | 5.50     | C(1)-As(1)-C(9) | 97.2(2)  |
|                                                |          | C(4)-As(1)-C(9) | 101.3(2) |
|                                                |          | C(2)-S(1)-C(6)  | 91.1(2)  |
|                                                |          | C(3)-S(2)-C(7)  | 90.6(2)  |
|                                                |          | As(1)-C(1)-C(2) | 111.0(3) |
| As(1)-C(1)                                     | 1.956(4) | As(1)-C(1)-C(5) | 136.2(3) |
| As(1)-C(4)                                     | 1.951(4) | C(2)-C(1)-C(5)  | 112.6(3) |
| As(1)-C(9)                                     | 1.965(4) | S(1)-C(2)-C(1)  | 111.4(3) |
| S(1)-C(2)                                      | 1.726(4) | S(1)-C(2)-C(3)  | 132.6(3) |
| S(1)-C(6)                                      | 1.718(5) | C(1)-C(2)-C(3)  | 116.0(3) |
| S(2)-C(3)                                      | 1.721(4) | S(2)-C(3)-C(2)  | 131.7(3) |
| S(2)-C(7)                                      | 1.726(5) | S(2)-C(3)-C(4)  | 112.1(3) |
| C(1)-C(2)                                      | 1.380(5) | C(2)-C(3)-C(4)  | 116.1(3) |
| C(2)-C(3)                                      | 1.440(5) | As(1)-C(4)-C(3) | 111.4(3) |
| C(3)-C(4)                                      | 1.375(5) | As(1)-C(4)-C(8) | 135.6(3) |
| C(1)-C(5)                                      | 1.416(5) |                 |          |
| C(5)-C(6)                                      | 1.359(6) |                 |          |
| C(4)-C(8)                                      | 1.427(5) |                 |          |
| C(7)-C(8)                                      | 1.352(6) |                 |          |

**Table S2.** ORTEP drawing (ellipsoids at 50% probability), selected angles (deg) and distances (Å) of 4.

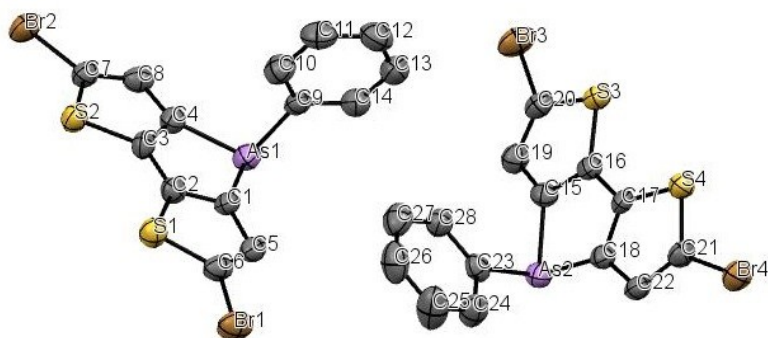

| interplanar angle (°)                                  |          | angle (°)         |          |
|--------------------------------------------------------|----------|-------------------|----------|
| As(1)C(1)C(2)C(3)C(4)-<br>S(1)C(2)C(1)C(5)C(6)         | 1.35     | C(1)-As(1)-C(4)   | 85.4(2)  |
| As(1)C(1)C(2)C(3)C(4)-<br>S(2)C(3)C(4)C(8)C(7)         | 5.27     | C(1)-As(1)-C(9)   | 96.3(2)  |
| As(2)C(15)C(16)C(17)C(18)-<br>S(3)C(16)C(15)C(19)C(20) | 1.07     | C(4)-As(1)-C(9)   | 100.8(2) |
| As(2)C(15)C(16)C(17)C(18)-<br>S(4)C(17)C(18)C(22)C(21) | 2.89     | C(15)-As(2)-C(18) | 85.1(2)  |
|                                                        |          | C(15)-As(2)-C(23) | 99.2(2)  |
|                                                        |          | C(18)-As(2)-C(23) | 96.3(2)  |
|                                                        |          | As(1)-C(1)-C(2)   | 111.9(4) |
|                                                        |          | C(1)-C(2)-C(3)    | 115.2(5) |
|                                                        |          | C(2)-C(3)-C(4)    | 116.1(5) |
| As(1)-C(1)                                             | 1.948(5) | As(1)-C(4)-C(3)   | 111.4(4) |
| As(1)-C(4)                                             | 1.946(6) | As(2)-C(15)-C(16) | 110.8(4) |
| As(1)-C(9)                                             | 1.959(5) | C(15)-C(16)-C(17) | 117.0(5) |
| As(2)-C(15)                                            | 1.952(5) | C(16)-C(17)-C(18) | 115.6(5) |
| As(2)-C(18)                                            | 1.964(5) | As(2)-C(18)-C(17) | 111.2(4) |
| As(2)-C(23)                                            | 1.970(5) | C(2)-S(1)-C(6)    | 89.3(3)  |
| S(1)-C(2)                                              | 1.721(5) | C(3)-S(2)-C(7)    | 90.2(3)  |
| S(1)-C(6)                                              | 1.721(7) | C(16)-S(3)-C(20)  | 90.3(3)  |
| S(2)-C(3)                                              | 1.725(6) | C(17)-S(4)-C(21)  | 90.4(3)  |
| S(2)-C(7)                                              | 1.723(6) |                   |          |
| S(3)-C(16)                                             | 1.725(5) |                   |          |
| S(3)-C(20)                                             | 1.727(6) |                   |          |
| S(4)-C(17)                                             | 1.712(5) |                   |          |
| S(4)-C(21)                                             | 1.724(6) |                   |          |
| C(1)-C(2)                                              | 1.375(8) |                   |          |

|             |          |
|-------------|----------|
| C(3)-C(4)   | 1.377(7) |
| C(2)-C(3)   | 1.451(8) |
| C(15)-C(16) | 1.371(6) |
| C(17)-C(18) | 1.369(6) |
| C(16)-C(17) | 1.434(8) |

---





|             |         |                        |          |
|-------------|---------|------------------------|----------|
| S(4)-C(34)  | 1.74(1) | S(4)-C(34)-C(41)-C(42) | 15.40(2) |
| C(1)-C(2)   | 1.37(1) |                        |          |
| C(3)-C(4)   | 1.36(2) |                        |          |
| C(2)-C(3)   | 1.43(1) |                        |          |
| C(27)-C(28) | 1.36(2) |                        |          |
| C(28)-C(30) | 1.44(1) |                        |          |
| C(29)-C(30) | 1.35(1) |                        |          |
| C(6)-C(9)   | 1.46(2) |                        |          |
| C(8)-C(15)  | 1.46(1) |                        |          |
| C(32)-C(35) | 1.46(1) |                        |          |
| C(34)-C(41) | 1.46(2) |                        |          |

---

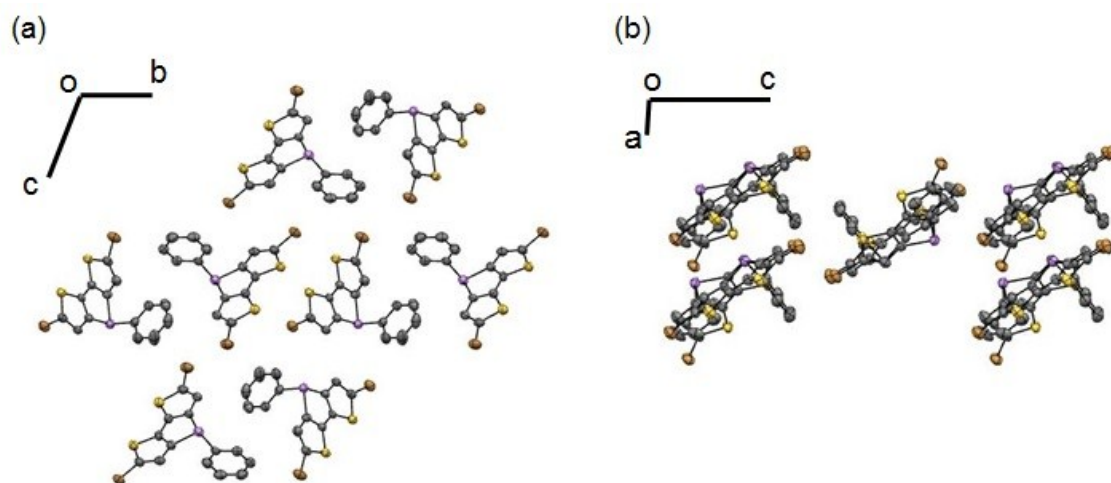

**Fig. S9** Packing structures of **4** along (a) *a*-axis and (b) *b*-axis. Hydrogen atoms are omitted for clarity.

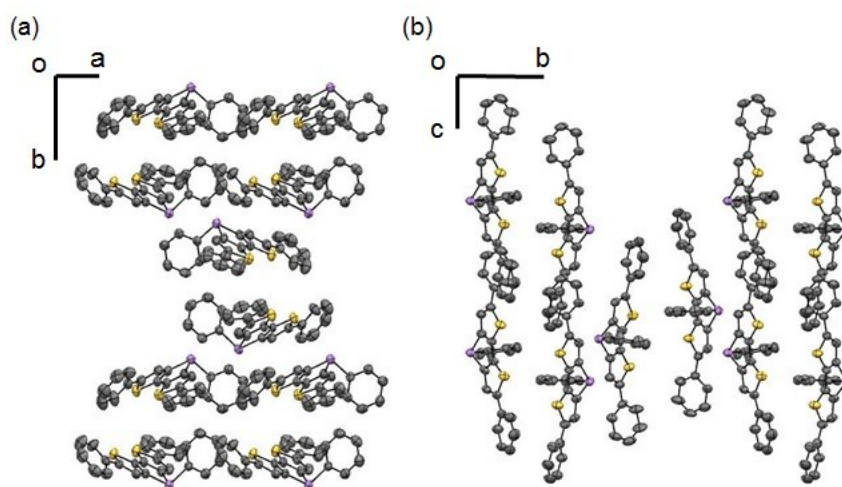

**Fig. S10** Packing structures of **5** along (a) *c*-axis and (b) *a*-axis. Hydrogen atoms are omitted for clarity.

### 3. Optical properties

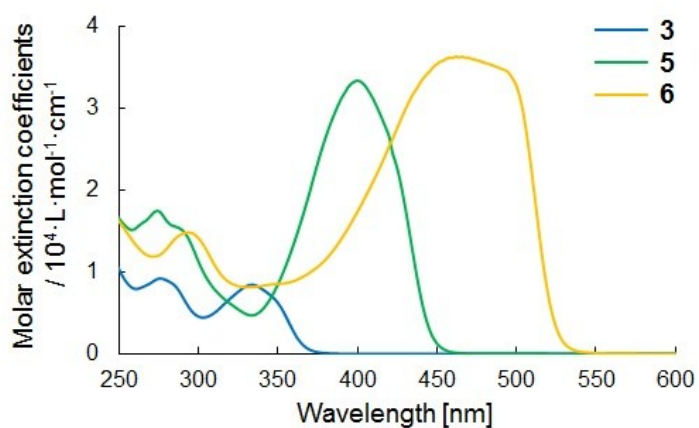

Fig. S11 UV-vis absorption spectra of **3**, **5** and **6** ( $1.0 \times 10^{-4}$  M  $\text{CHCl}_3$  solution).

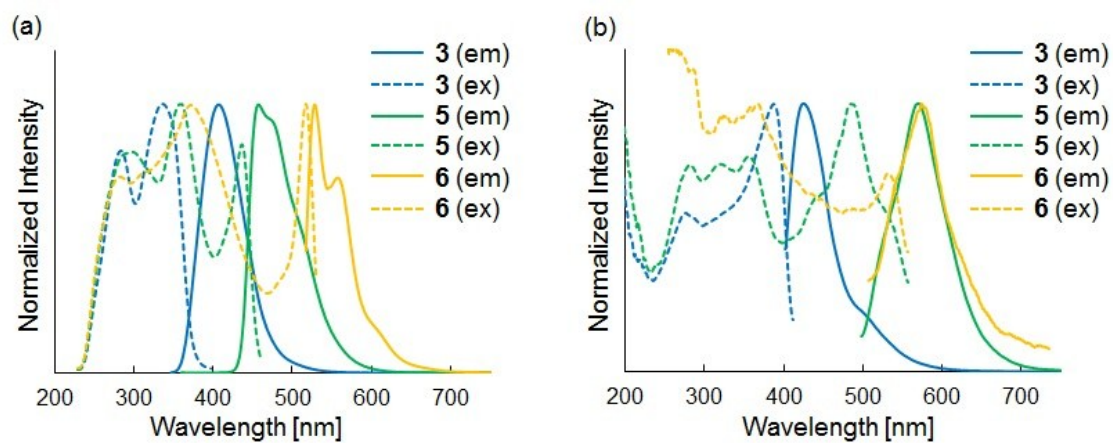

Fig. S12 PL and excitation spectra of **3**, **5** and **6** in (a) solutions ( $1.0 \times 10^{-4}$  M in  $\text{CHCl}_3$ ) and (b) solid states.

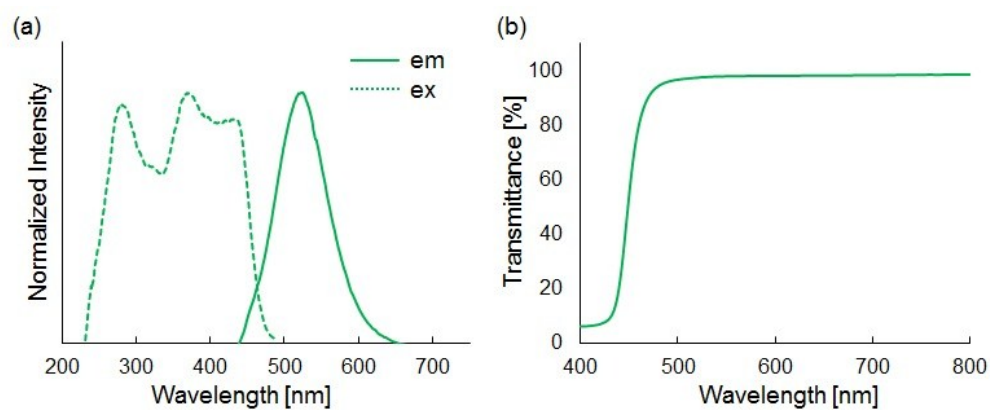

**Fig. S13** (a) PL and excitation spectra and (b) transmission spectrum of **5**/PMMA film (10 wt%).

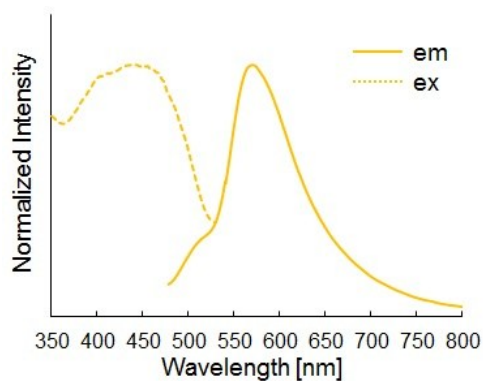

**Fig. S14** (a) PL and excitation spectra and (b) transmission spectrum of **6**/PMMA film (10 wt%).

#### 4. CV data

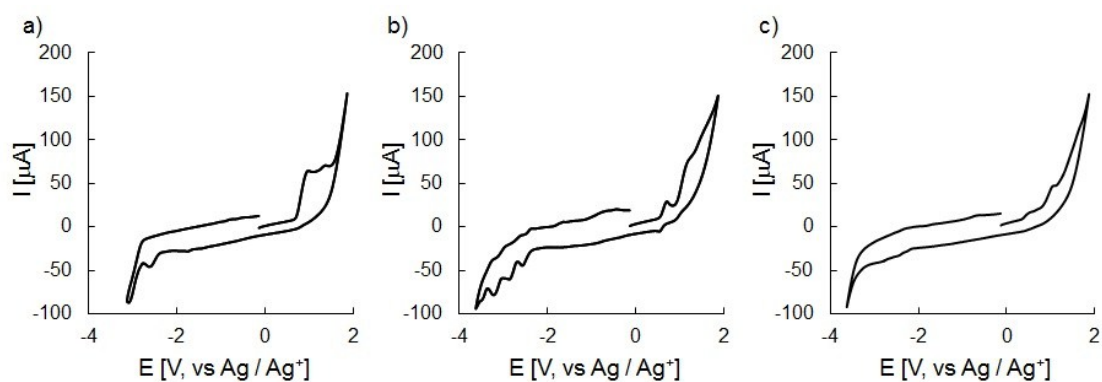

**Fig. S15** Cyclic voltammograms of (a) **3** (b) **5**, and (c) **6** measured in THF solutions ( $c = 0.1\text{ M}$ ) at the scan rate of  $100\text{ mV/s}$  under  $\text{N}_2$ . The working electrode was a glassy carbon, the counter electrode was a platinum wire, and the reference electrode was an  $\text{Ag}^0 / \text{Ag}^+$ .

## 5. Theoretical calculations

**Table S4.** Atom coordinates and absolute energy level for **3** optimized in the  $S_0$  state.

---

**3** ( $S_0$  state): E(RB3LYP) = -3569.10172537 A.U.

---

| Center Number | Atomic Number | Atomic Type | Coordinates (Angstroms) |         |         |
|---------------|---------------|-------------|-------------------------|---------|---------|
|               |               |             | X                       | Y       | Z       |
| 1             | 33            | 0           | -0.5332                 | -0.0001 | -1.3449 |
| 2             | 16            | 0           | 2.8151                  | 1.8926  | 0.7597  |
| 3             | 16            | 0           | 2.8151                  | -1.8925 | 0.7599  |
| 4             | 6             | 0           | 0.6125                  | 1.3291  | -0.4884 |
| 5             | 6             | 0           | 1.6913                  | 0.7226  | 0.1353  |
| 6             | 6             | 0           | 1.6913                  | -0.7225 | 0.1353  |
| 7             | 6             | 0           | 0.6125                  | -1.3292 | -0.4883 |
| 8             | 6             | 0           | 0.6973                  | 2.749   | -0.4755 |
| 9             | 6             | 0           | 1.8197                  | 3.2009  | 0.1723  |
| 10            | 6             | 0           | 1.8198                  | -3.2008 | 0.1725  |
| 11            | 6             | 0           | 0.6974                  | -2.7491 | -0.4754 |
| 12            | 6             | 0           | -2.0826                 | 0       | -0.1376 |
| 13            | 6             | 0           | -1.9656                 | 0.0002  | 1.2578  |
| 14            | 6             | 0           | -3.1034                 | 0.0003  | 2.0649  |
| 15            | 6             | 0           | -4.3762                 | 0.0001  | 1.482   |
| 16            | 6             | 0           | -4.5029                 | -0.0002 | 0.0919  |
| 17            | 6             | 0           | -3.3581                 | -0.0002 | -0.7134 |
| 18            | 1             | 0           | -0.0373                 | 3.414   | -0.9153 |
| 19            | 1             | 0           | 2.1312                  | 4.2225  | 0.3426  |
| 20            | 1             | 0           | 2.1312                  | -4.2225 | 0.3429  |
| 21            | 1             | 0           | -0.0372                 | -3.4141 | -0.9152 |
| 22            | 1             | 0           | -0.9817                 | 0.0003  | 1.7182  |
| 23            | 1             | 0           | -2.9996                 | 0.0005  | 3.1465  |
| 24            | 1             | 0           | -5.2626                 | 0.0001  | 2.11    |
| 25            | 1             | 0           | -5.4874                 | -0.0003 | -0.3675 |
| 26            | 1             | 0           | -3.4631                 | -0.0004 | -1.7955 |

---

**Table S5.** Atom coordinates and absolute energy level for **5** optimized in the  $S_0$  state. $5$  ( $S_0$  state): E(RB3LYP) = -4031.24967753 A.U.

| Center Number | Atomic Number | Atomic Type | Coordinates (Angstroms) |         |         |
|---------------|---------------|-------------|-------------------------|---------|---------|
|               |               |             | X                       | Y       | Z       |
| 1             | 33            | 0           | 0.0035                  | 1.566   | -1.4191 |
| 2             | 16            | 0           | 1.8927                  | -1.9886 | 0.3241  |
| 3             | 16            | 0           | -1.8905                 | -1.9816 | 0.3364  |
| 4             | 6             | 0           | 1.3288                  | 0.3238  | -0.7049 |
| 5             | 6             | 0           | 0.7218                  | -0.8129 | -0.1904 |
| 6             | 6             | 0           | -0.7189                 | -0.8137 | -0.1913 |
| 7             | 6             | 0           | -1.3251                 | 0.3216  | -0.709  |
| 8             | 6             | 0           | 2.7416                  | 0.2412  | -0.7022 |
| 9             | 6             | 0           | 3.2248                  | -0.9386 | -0.1683 |
| 10            | 6             | 0           | -3.2221                 | -0.9201 | -0.1313 |
| 11            | 6             | 0           | -2.7389                 | 0.2534  | -0.6801 |
| 12            | 6             | 0           | -0.0036                 | 2.9527  | -0.0249 |
| 13            | 6             | 0           | 0.0009                  | 2.6588  | 1.3437  |
| 14            | 6             | 0           | -0.0065                 | 3.6853  | 2.2882  |
| 15            | 6             | 0           | -0.0173                 | 5.0215  | 1.8707  |
| 16            | 6             | 0           | -0.0216                 | 5.3233  | 0.5076  |
| 17            | 6             | 0           | -0.0152                 | 4.2901  | -0.4368 |
| 18            | 1             | 0           | 3.3946                  | 1.0125  | -1.094  |
| 19            | 6             | 0           | 4.6214                  | -1.3431 | 0.0239  |
| 20            | 6             | 0           | -4.6173                 | -1.3275 | 0.0682  |
| 21            | 1             | 0           | -3.3914                 | 1.0505  | -1.0174 |
| 22            | 1             | 0           | 0.0093                  | 1.6246  | 1.6749  |
| 23            | 1             | 0           | -0.0035                 | 3.4458  | 3.3479  |
| 24            | 1             | 0           | -0.0226                 | 5.8215  | 2.6055  |
| 25            | 1             | 0           | -0.0304                 | 6.3582  | 0.1769  |
| 26            | 1             | 0           | -0.0187                 | 4.5302  | -1.4972 |
| 27            | 6             | 0           | 5.6252                  | -0.3652 | 0.1764  |
| 28            | 6             | 0           | 5.0032                  | -2.6979 | 0.0696  |
| 29            | 6             | 0           | 6.3372                  | -3.0603 | 0.2544  |
| 30            | 6             | 0           | 6.9583                  | -0.7308 | 0.354   |
| 31            | 6             | 0           | 7.3235                  | -2.08   | 0.3935  |
| 32            | 1             | 0           | 4.2535                  | -3.4731 | -0.0613 |
| 33            | 1             | 0           | 6.6067                  | -4.1123 | 0.2816  |
| 34            | 1             | 0           | 5.353                   | 0.6855  | 0.1823  |
| 35            | 1             | 0           | 7.7133                  | 0.0412  | 0.4735  |
| 36            | 1             | 0           | 8.362                   | -2.3633 | 0.5365  |
| 37            | 6             | 0           | -4.9851                 | -2.2434 | 1.073   |
| 38            | 6             | 0           | -5.6343                 | -0.8026 | -0.7546 |
| 39            | 6             | 0           | -6.9662                 | -1.1685 | -0.5677 |
| 40            | 6             | 0           | -6.3174                 | -2.6159 | 1.2507  |
| 41            | 6             | 0           | -7.3165                 | -2.0785 | 0.4347  |
| 42            | 1             | 0           | -5.374                  | -0.1217 | -1.5588 |

|    |   |   |         |         |         |
|----|---|---|---------|---------|---------|
| 43 | 1 | 0 | -7.7314 | -0.7519 | -1.2165 |
| 44 | 1 | 0 | -4.2256 | -2.6505 | 1.7344  |
| 45 | 1 | 0 | -6.5753 | -3.3215 | 2.0352  |
| 46 | 1 | 0 | -8.3538 | -2.3671 | 0.5754  |

---
